# Supplementary figures and images for: The Test of the Availability Hypothesis Reveals the Needs for Ex-Situ Conservation for Some Protected Area-Restricted Species
Source: MDPI journal article supplement (doi:10.3390/d14080693), 2022-08-22

plant abundance inside Kruger National Park

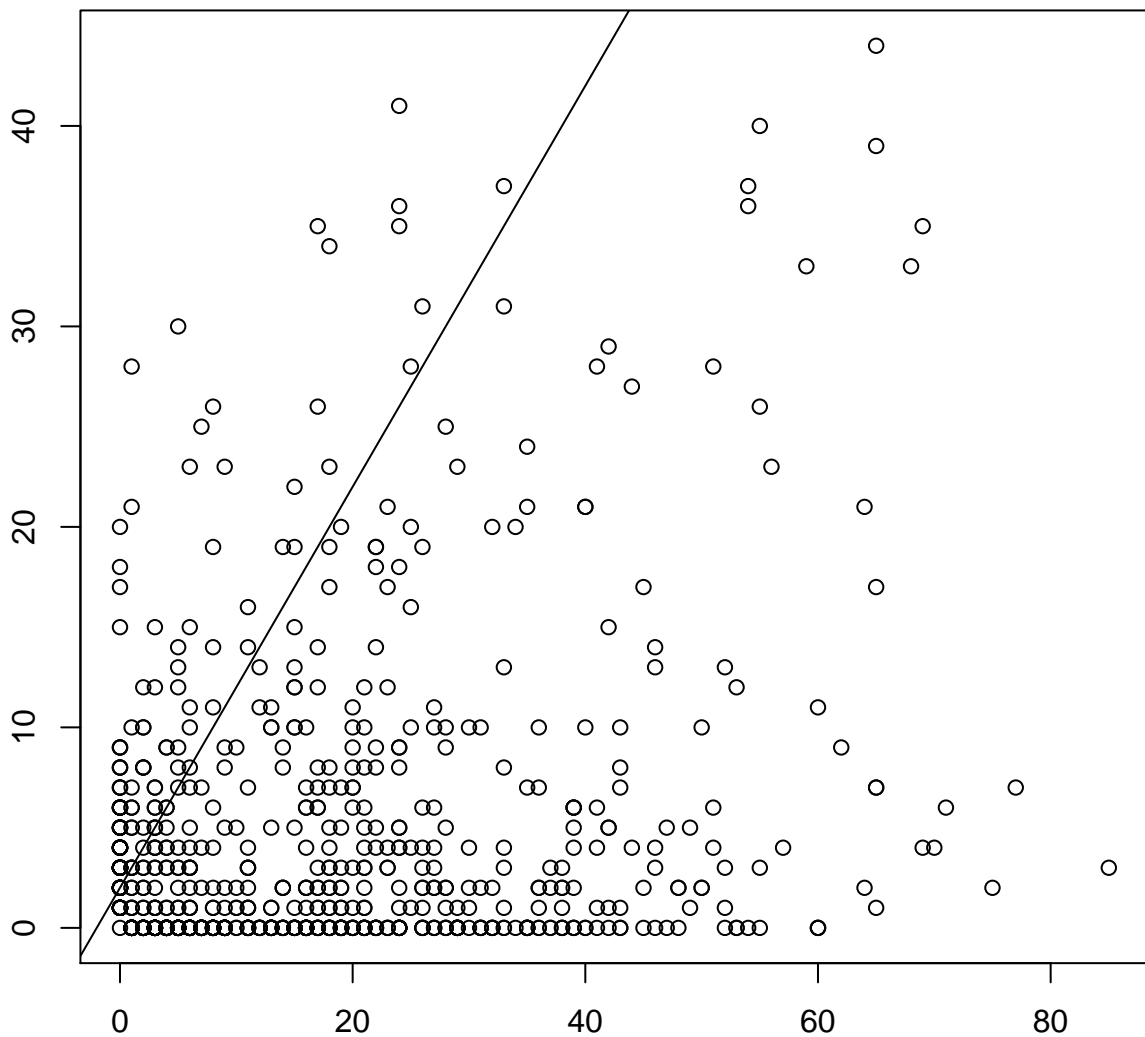

plant abundance outside Kruger National Park

Supplement: s1 [file s1]
